# Supplementary material for: Kreon® (Creon®) vs. Lipancrea®: In Vitro Comparison of Two Encapsulated Pancreatin Preparations
Source: MDPI journal article supplement (doi:10.3390/ph15121570), 2022-12-16
Supplement: s1 [file s1]

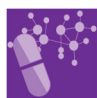

Table S 1: Pancreatic enzyme preparations investigated

| DRUG PRODUCT                                             | BATCH NO. | TEST RECORDS                              |
|----------------------------------------------------------|-----------|-------------------------------------------|
| <b>Kreon® 10000</b><br>(Mylan Healthcare, Viatris Group) | 57797     | Microscopy, particle sizing               |
|                                                          | 55399     | Capsule fill weight<br>Enzymatic analysis |
| <b>Kreon® 25000</b><br>(Mylan Healthcare, Viatris Group) | 58259     | Microscopy, particle sizing               |
| <b>Lippancrea® 8000</b><br>(Polfa Warszawa S.A.)         | 55433     | Capsule fill weight<br>Enzymatic analysis |
|                                                          | 011119    | Microscopy, particle sizing               |
| <b>Lippancrea® 16000</b><br>(Polfa Warszawa S.A.)        | 02NG0217  | Capsule fill weight<br>Enzymatic analysis |
|                                                          | 01MP0619  | Microscopy, particle sizing               |
